# Supplementary material for: Identification of three MAPKKKs forming a linear signaling pathway leading to programmed cell death in Nicotiana benthamiana
Source: PubMed Central journal article supplement (PMC3507812; doi:10.1186/1471-2229-12-103), 2012-07-08

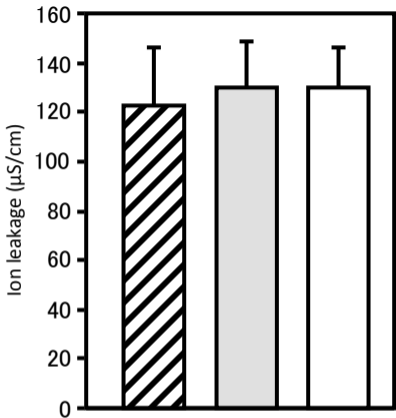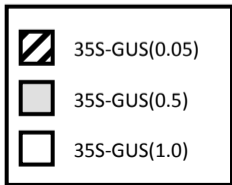

Supplement: 1471-2229-12-103-S2.pdf [file 1471-2229-12-103-S2.pdf]
